# Supplementary material for: A narrative review of research progress on the role of NLRP3 inflammasome in acne vulgaris
Source: PubMed Central journal article supplement — Ann Transl Med. 2022 Jun;10(11):645. doi: 10.21037/atm-21-5924 (PMC9263782; doi:10.21037/atm-21-5924), 2022-06
Supplement: atm-10-11-645-rc.pdf [file atm-10-11-645-rc.pdf]

## Narrative Review Checklist

| Section/Topic             | Item No | Item                                                                                                                                                                               | Reported on Page Number/Line Number | Reported on Section/Paragraph |
|---------------------------|---------|------------------------------------------------------------------------------------------------------------------------------------------------------------------------------------|-------------------------------------|-------------------------------|
| <b>TITLE</b>              |         |                                                                                                                                                                                    |                                     |                               |
| Title                     | 1       | Identify the report as a Narrative Review or Literature Review.                                                                                                                    | Page 1/Line 1-2                     | Title                         |
| <b>ABSTRACT</b>           |         |                                                                                                                                                                                    |                                     |                               |
| Structured summary        | 2       | Provide a structured summary with the subsections as: Background and Objective, Methods, Key Content and Findings, Conclusions.                                                    | Page 2-3/Line 17-38                 | Abstract                      |
| <b>INTRODUCTION</b>       |         |                                                                                                                                                                                    |                                     |                               |
| Rationale/background      | 3       | Describe the rationale for the review in the context of what is already known.                                                                                                     | Page 4/Line 42-61                   | Introduction/Paragraph 1-2    |
| Objectives                | 4       | Specify the key question(s) identified for the review topic.                                                                                                                       | Page 4/Line 55-61                   | Introduction/Paragraph 2      |
| <b>METHODS</b>            |         |                                                                                                                                                                                    |                                     |                               |
| Research selection        | 5       | Specify the process for identifying the literature search (eg, years considered, language, publication status, study design, and databases of coverage).                           | Page 5/Line 63-67                   | Methods/Paragraph 1           |
| <b>DISCUSSION/SUMMARY</b> |         |                                                                                                                                                                                    |                                     |                               |
| Narrative                 | 6       | Discuss: 1) research reviewed including fundamental or key findings, 2) limitations and/or quality of research reviewed, and 3) need for future research.                          | Page 16-17/Line 290-305             | Summary/Paragraph 14          |
| Summary                   | 7       | Provide an overall interpretation of the narrative review in the context of clinical practice for health professionals, policy development and implementation, or future research. | Page 17/Line 295-305                | Summary/Paragraph 14          |

Article information: <https://dx.doi.org/10.21037/atm-21-5924>

\*As the checklist was provided upon initial submission, the page number/line number reported may be changed due to copyediting and may not be referable in the published version. In this case, the section/paragraph may be used as an alternative reference.
